# Supplementary material for: Light-activatable Chlorin e6 (Ce6)-imbedded erythrocyte membrane vesicles camouflaged Prussian blue nanoparticles for synergistic photothermal and photodynamic therapies of cancer
Source: Royal Society of Chemistry journal article supplement (doi:10.1039/c8bm00812d), 2018-01-01
Supplement: c8bm00812d1.pdf [file c8bm00812d1.pdf]

## Electronic Supplementary Information (ESI)

# Light-activatable Chlorin e6 (Ce6)-imbedded Erythrocyte Membrane Vesicles Camouflaged Prussian Blue Nanoparticles for Synergistic Photothermal and Photodynamic Therapies of Cancer

Lihong Sun<sup>a, b</sup>, Qian Li<sup>a, b</sup>, Mengmeng Hou<sup>a, b</sup>, Ya Gao<sup>a, b</sup>, Ruihao Yang<sup>a, b</sup>, Lei Zhang<sup>c</sup>,  
Zhigang Xu<sup>a, b</sup>, Yuejun Kang<sup>\*a, b</sup>, Peng Xue<sup>\*a, b</sup>

<sup>a</sup> Institute for Clean Energy and Advanced Materials, Faculty of Materials and Energy, Southwest University, Chongqing 400715, China. E-mails: [xuepeng@swu.edu.cn](mailto:xuepeng@swu.edu.cn) (P. Xue); [yjkang@swu.edu.cn](mailto:yjkang@swu.edu.cn) (Y. Kang)

<sup>b</sup> Chongqing Engineering Research Center for Micro-Nano Biomedical Materials and Devices, Chongqing 400715, China.

<sup>c</sup> State Key Laboratory of Silkworm Genome Biology, Southwest University, Chongqing 400716, China.

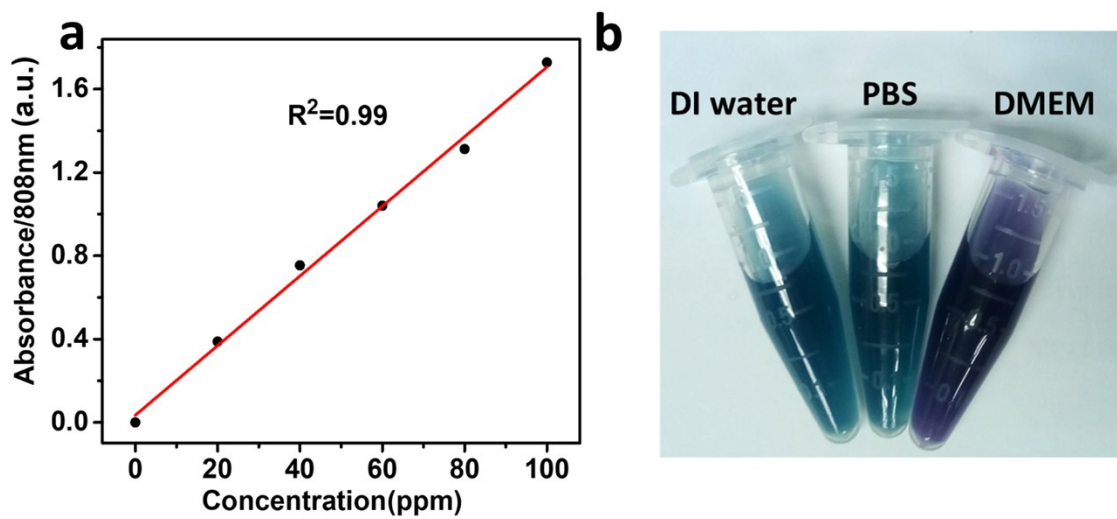

**Fig. S1** (a) Fitting curve of the NIR absorbance of PB@RBC/Ce6 NPs at 808 nm as the function of concentration in the range from 0 to 100 ppm; (b) images of PB@RBC/Ce6 NPs dispersed in water, 1×PBS and DMEM culture medium.

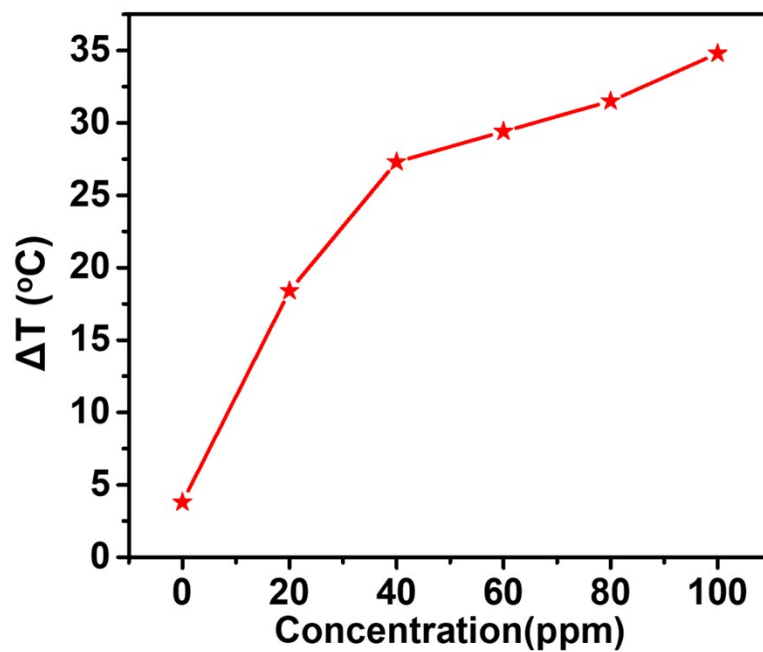

**Fig. S2** Temperature variation of PB@RBC/Ce6 NPs after irradiation by NIR laser versus the agent concentrations in the range from 0 to 100 ppm.

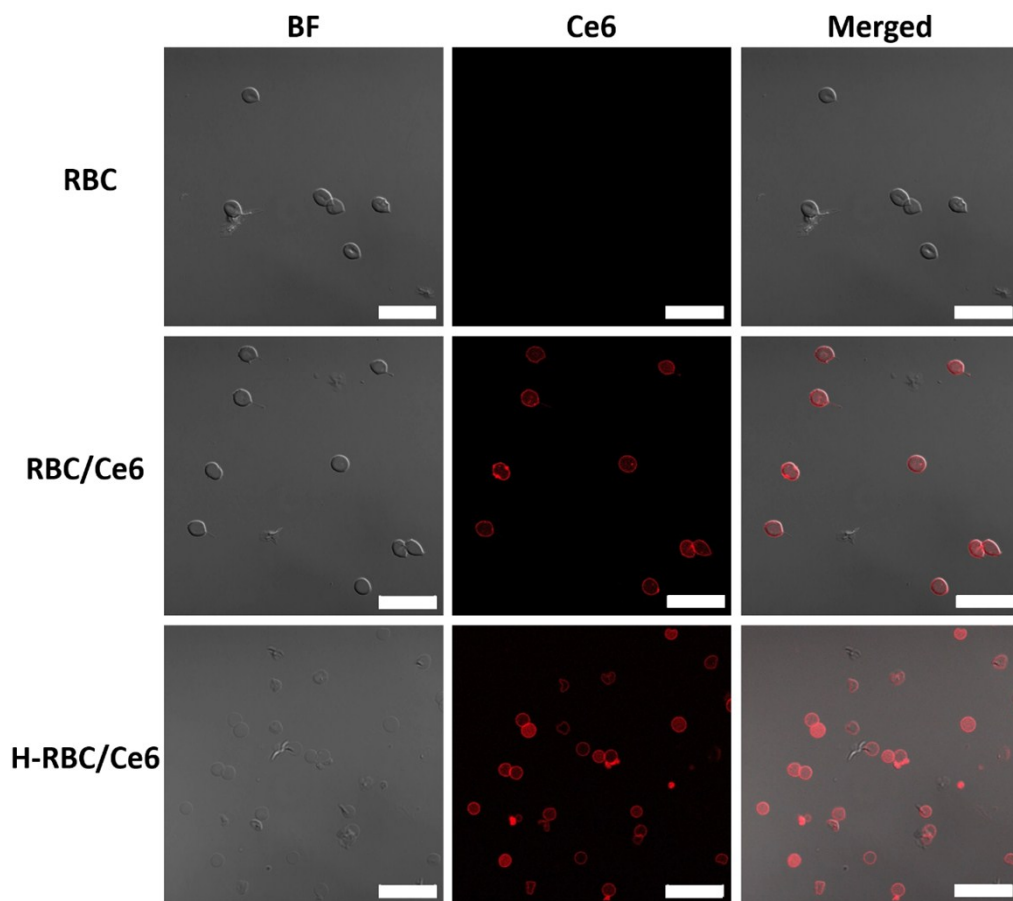

**Fig. S3** Fluorescence microscopic images of RBC, RBC/Ce6 and RBC/Ce6 after hemolysis (scale bars: 20  $\mu\text{m}$ ).

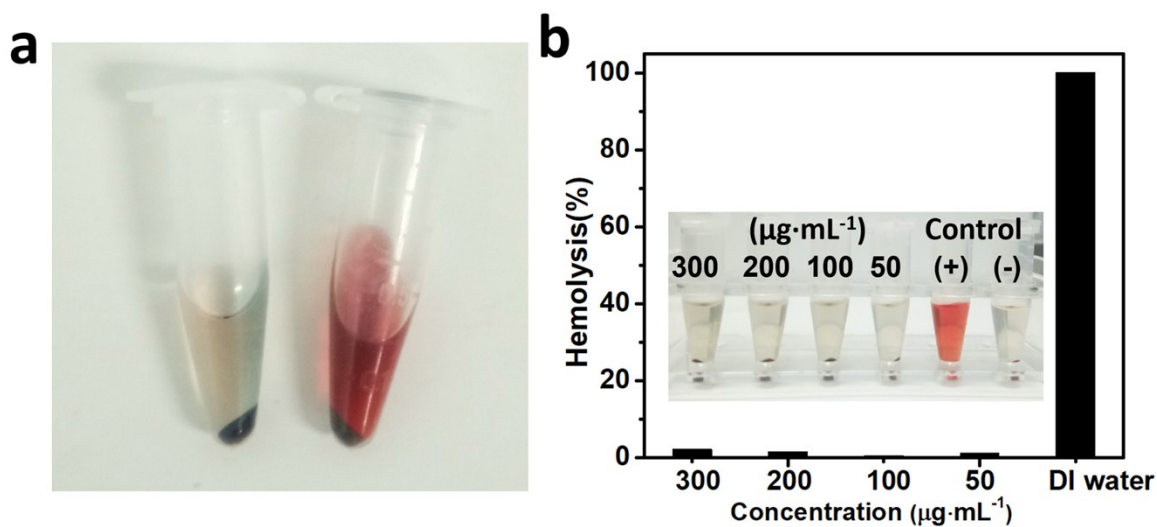

**Fig. S4** (a) Images of Ce6-imbedded RBCs before and after laser irradiation (660 nm, 0.76 W) for 5 min; the red color after RBC disintegration denoted the released hemoglobin; (b) Hemocompatibility tests by incubating RBCs in the solutions of PB@RBC/Ce6 NPs under various concentrations. RBC suspensions in DI water (+) and 1×PBS (-) were also tested as controls.

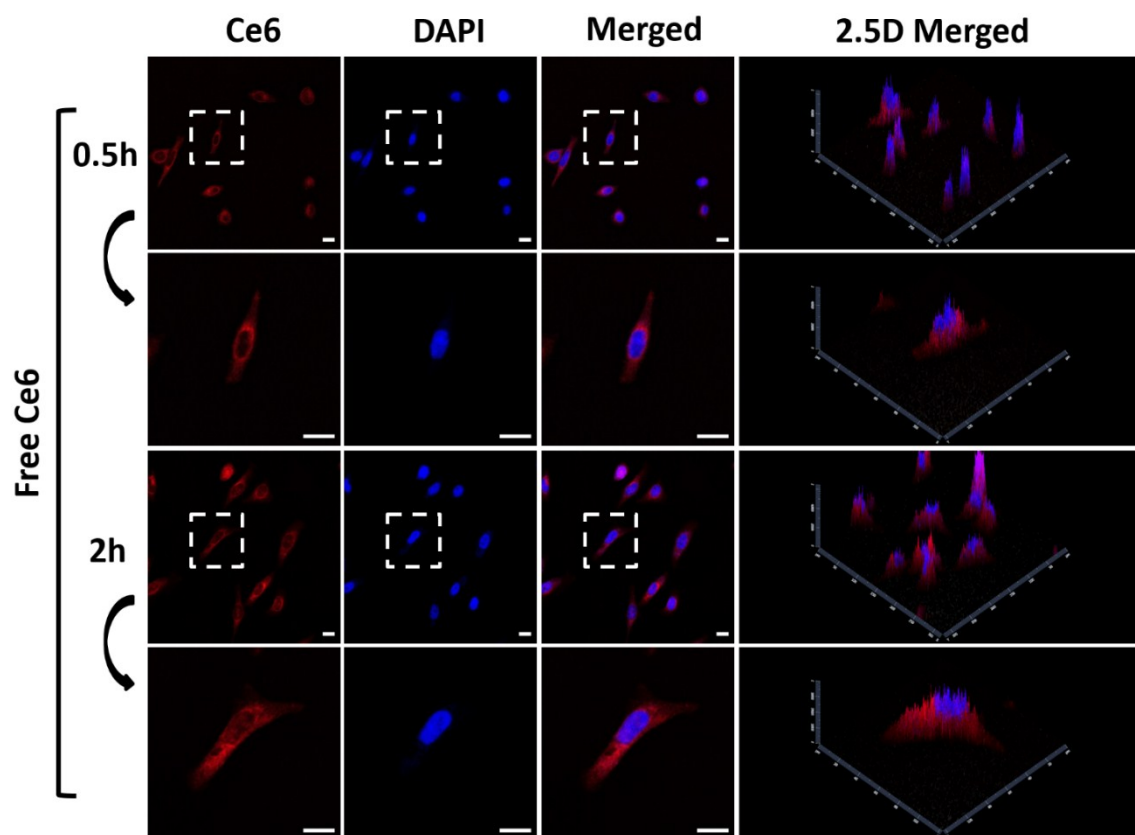

**Fig. S5** CLSM characterization: images of HeLa cells treated with free Ce6 for 0.5 h or 2 h under various magnifications (images of 2<sup>nd</sup> and 4<sup>th</sup> row are the enlarged section of dashed box in 1<sup>st</sup> and 3<sup>rd</sup> row, respectively). The fluorescence of DAPI and Ce6 are colored as blue and red, respectively (scale bars: 20  $\mu\text{m}$ ).

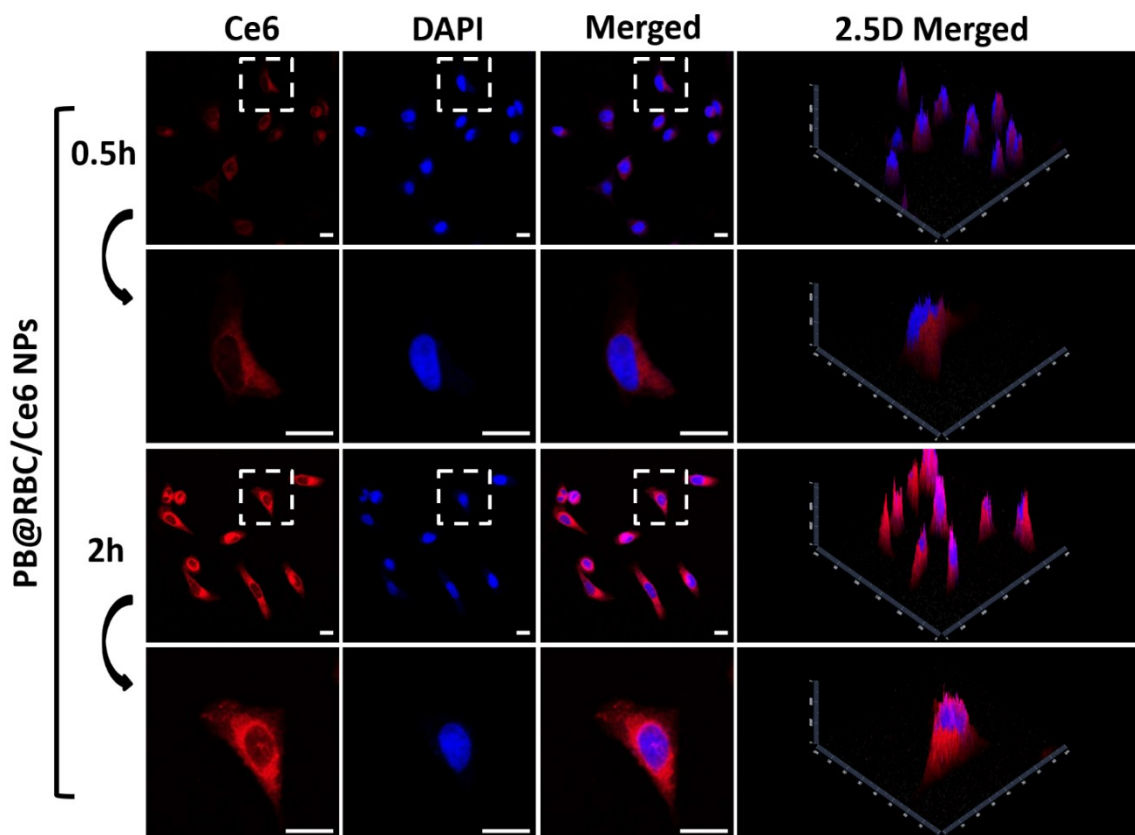

**Fig. S6** CLSM characterization: images of HeLa cells treated with PB@RBC/Ce6 NPs for 0.5 h or 2 h under various magnifications (images of 2<sup>nd</sup> and 4<sup>th</sup> row are the enlarged section of dashed box in 1<sup>st</sup> and 3<sup>rd</sup> row, respectively). The fluorescence of DAPI and Ce6 are colored as blue and red, respectively (scale bars: 20  $\mu\text{m}$ ).

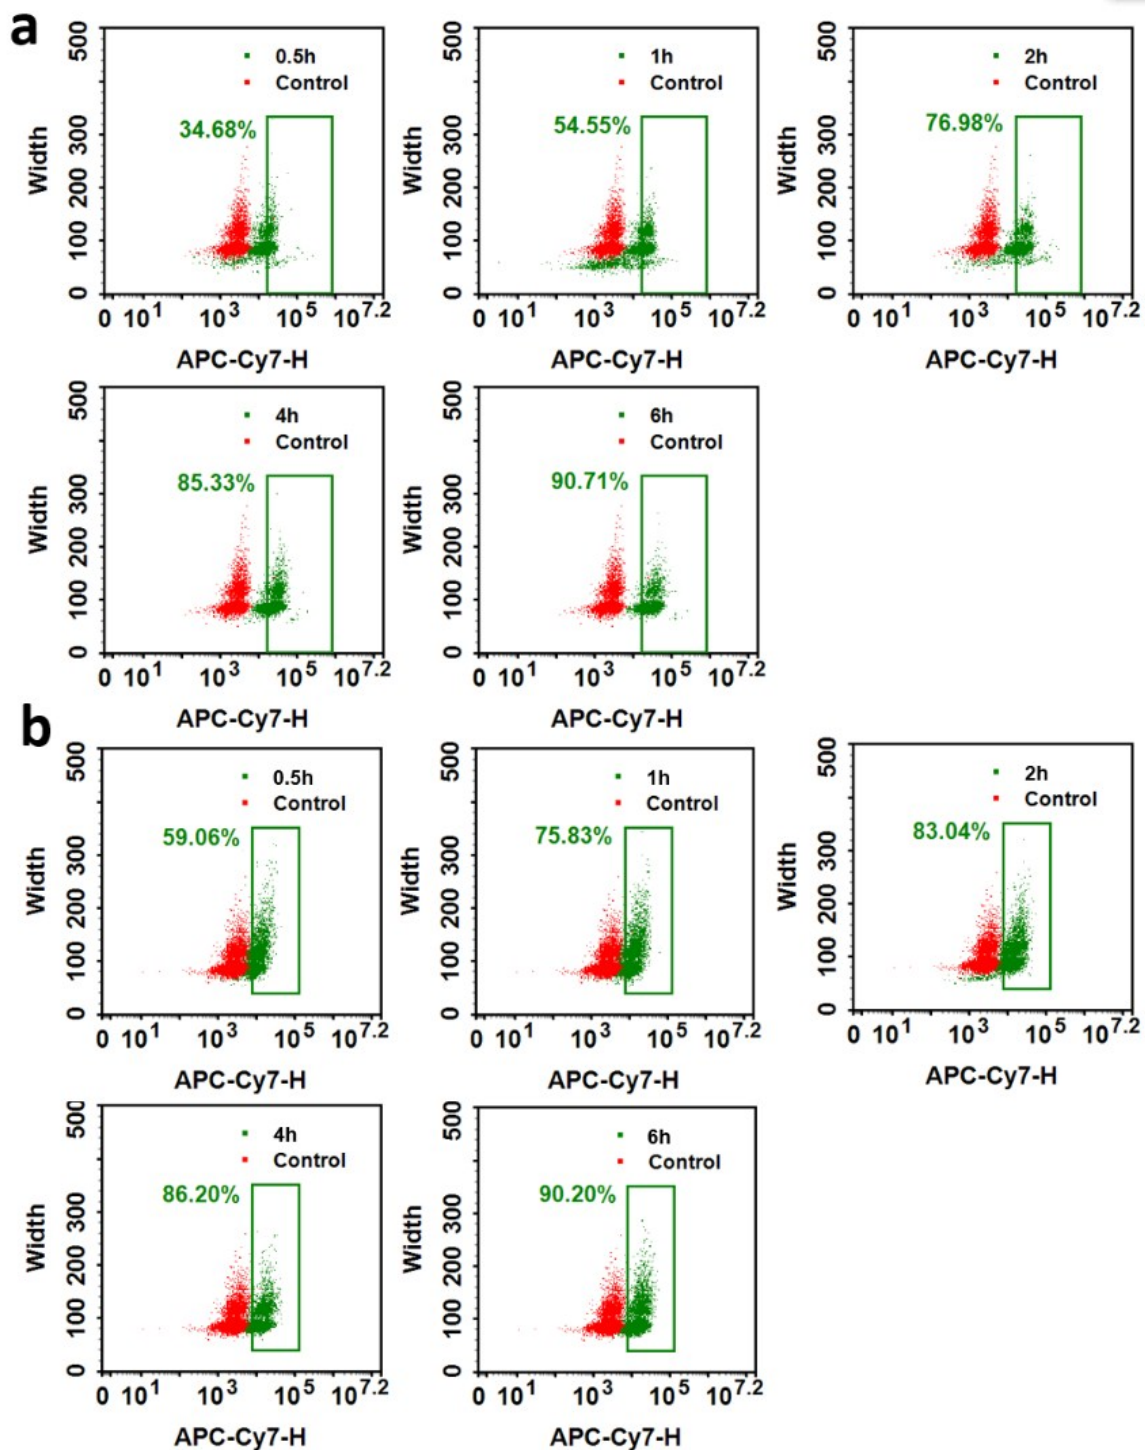

**Fig. S7** Flow cytometry analysis of the cellular uptake efficiency of Ce6 in 4T1 cells after treatment with (a) PB@RBC/Ce6 NPs or (b) free Ce6 for 0.5 h, 1 h, 2 h, 4 h and 6 h.



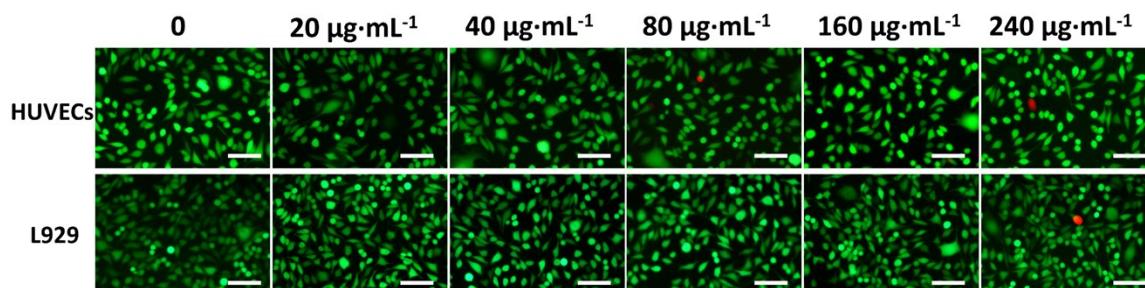

**Fig. S8** Fluorescence images to exhibit the viability of HUVECs or L929 cells through LIVE/DEAD viability/cytotoxicity assay kit after cells being treated with different concentrations of PB@RBC/Ce6 NPs for 24h. Viable cells were stained with green fluorescence while dead cells were stained with red fluorescence. (Scale bar: 100  $\mu\text{m}$ )

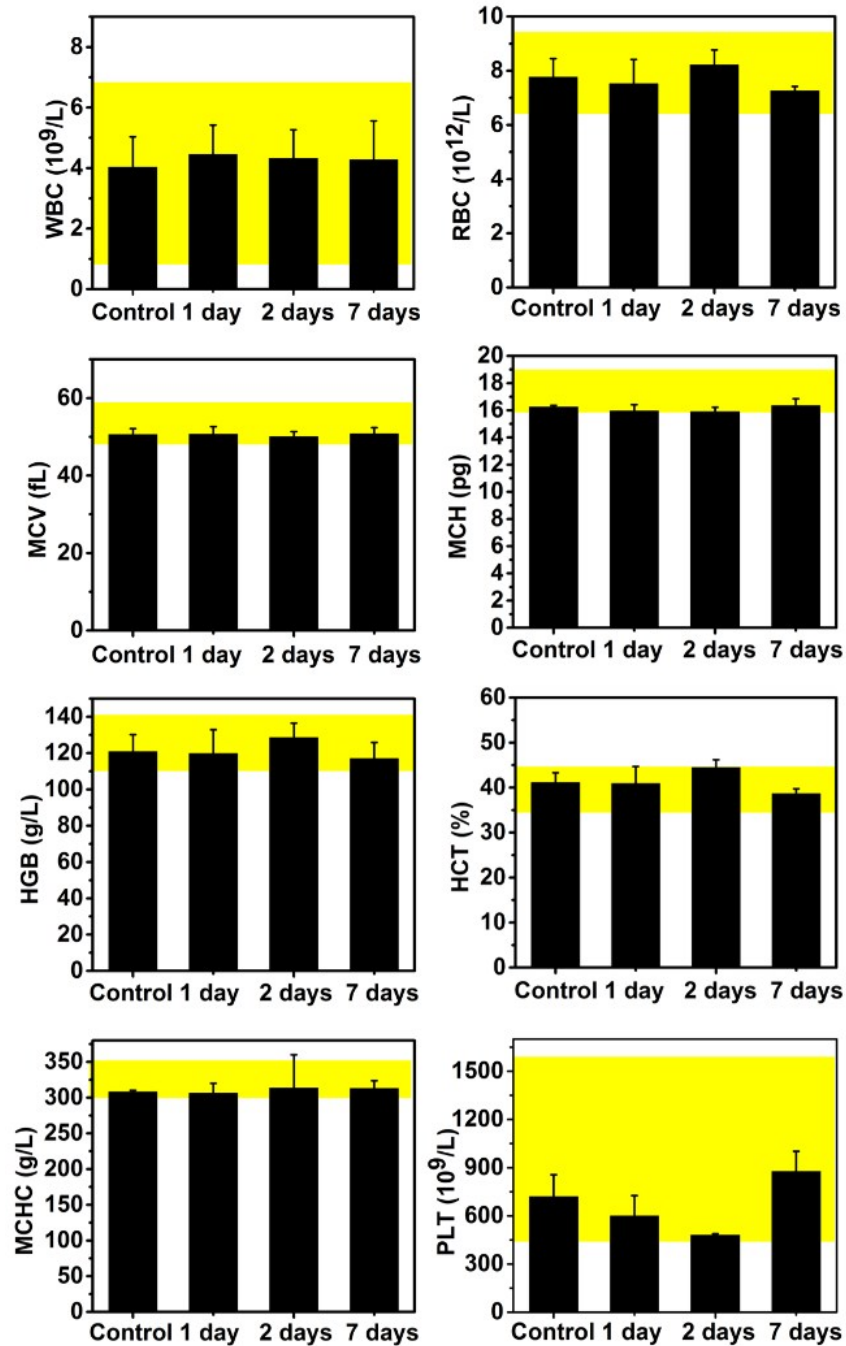

**Fig. S9** Primary indicators of blood routine test after healthy mice were intravenously injected with PB@RBC/Ce6 NPs. Reference ranges of hematology data of healthy female KM mice (yellow hatched area) were obtained from Chongqing Tengxin Biotechnology Co. LTD.

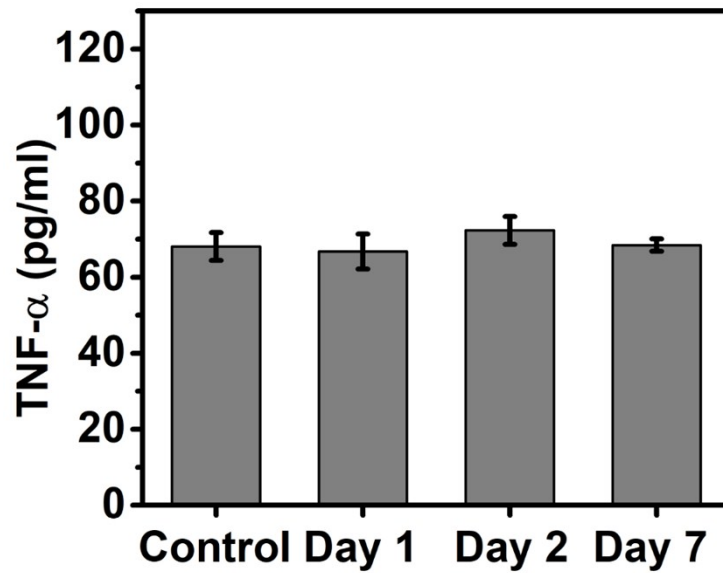

**Fig. S10** Change of TNF- $\alpha$  level in peripheral blood after KM mice were injected with PB@RBC/Ce6 NPs (equivalent PB concentration: 20 mg·kg<sup>-1</sup>).

**Table S1** Complete indicators of blood examinations after healthy mice were injected with PB@RBC/Ce6 NPs.

|                            | <i>Control</i> | <i>1st day</i> | <i>2nd day</i> | <i>7th day</i> | <i>Reference range</i> |
|----------------------------|----------------|----------------|----------------|----------------|------------------------|
| WBC (10 <sup>9</sup> /L)   | 4.03±1.01      | 4.45±0.97      | 4.33±0.95      | 4.275±1.29     | 0.8-6.8                |
| Lymph (10 <sup>9</sup> /L) | 3.03±0.84      | 3.125±0.61     | 3.05±0.61      | 2.075±0.11     | 0.7-5.7                |
| Mon (10 <sup>9</sup> /L)   | 0.18±0.04      | 0.125±0.04     | 0.18±0.04      | 0.15±0.09      | 0.0-0.3                |
| Gran (10 <sup>9</sup> /L)  | 0.83±0.17      | 1.2±0.34       | 1.1±0.3        | 0.7±0.17       | 0.1-1.8                |
| RBC (10 <sup>12</sup> /L)  | 7.77±0.68      | 7.53±0.89      | 8.22±0.55      | 7.2525±0.16    | 6.36-9.42              |
| HGB (g/L)                  | 120.75±9.42    | 119.75±13.25   | 128.5±8.08     | 117±8.86       | 110-143                |
| HCT (%)                    | 41.15±2.16     | 40.9±3.78      | 44.45±1.74     | 38.65±1.07     | 34.6-44.6              |
| MCV (fL)                   | 54.03±1.10     | 54.58±1.66     | 54.17±1.68     | 53.35±0.50     | 48.2-58.3              |
| MCH (pg)                   | 16.25±0.11     | 15.95±0.47     | 15.9±0.32      | 16.35±0.49     | 15.8-19.0              |
| MCHC (g/L)                 | 308±2.23       | 306.5±13.5     | 313.5±46.40    | 312.75±10.83   | 302-353                |
| RDW (%)                    | 16.25±0.66     | 143.05±218.79  | 16.3±0.50      | 16.3±0.41      | 13.0-17.0              |
| PLT (10 <sup>9</sup> /L)   | 718.75±137.52  | 600.25±125.67  | 479.25±9.39    | 875.75±125.91  | 450-1590               |
| MPV (fL)                   | 5.6±0.21       | 5.48±0.35      | 5.78±0.19      | 5.78±0.11      | 3.8-6.0                |
| PDW                        | 16.38±0.25     | 16.23±0.40     | 16.75±0.21     | 16.01±0.42     | -                      |
| PCT (%)                    | 0.40±0.08      | 0.27±0.10      | 0.15±0.07      | 0.51±0.08      | -                      |
